# Supplementary material
Source: publisher figshare collection journal article supplement (https://gsajournals.figshare.com/ndownloader/files/14127248)
Supplement: Supplementary file 1 [file 14127248]

## Sheet: Sheet1
Compound Name	Calibration Curve	R2	Linearity Range
			(ng/mL)
umbelliferone	Y = 24.673 * X – 125.505	0.999	20-20,000
luteolin	Y = 58.4144 * X -761.246	0.996	20-20,000
umbelliprenin	Y = 4.5332 * X – 26.2643	0.994	20-20,000
Compound Name	Calibration Curve	R2	Linearity Range
			(ng/mL)
umbelliferone	Y = 24.673 * X – 125.505	0.999	20-20,000
luteolin	Y = 58.4144 * X -761.246	0.996	20-20,000
umbelliprenin	Y = 4.5332 * X – 26.2643	0.994	20-20,000
